# Supplementary material
Source: HighWire-hosted journal article supplement (https://gh.bmj.com/content/4/1/e001172)
Supplement: inline-supplementary-material-2 [file inline-supplementary-material-2.pdf]

Supplementary File 2

Table S2. Associations between reported pregnancy complications and attendance for at least one antenatal care visit

| Variable                    |     | Attended any ANC | Crude OR | Adjusted OR <sup>1</sup> | 95% CIca of adjusted OR | p-value from test of heterogeneity of strata <sup>2</sup> |
|-----------------------------|-----|------------------|----------|--------------------------|-------------------------|-----------------------------------------------------------|
| Persistent headache         | No  | 2108/2489        | 0.80     | 0.50                     | <b>0.25-0.98</b>        | 0.826                                                     |
|                             | Yes | 1015/1162        |          |                          |                         |                                                           |
| Dizziness or blurred vision | No  | 2400/2798        | 1.08     | 0.79                     | <b>0.65-0.96</b>        | 0.303                                                     |
|                             | Yes | 723/853          |          |                          |                         |                                                           |
| Swelling of face or hands   | No  | 2638/3069        | 1.22     | 0.96                     | 0.89-1.04               | 0.301                                                     |
|                             | Yes | 485/97           |          |                          |                         |                                                           |
| Vaginal bleeding            | No  | 2951/3432        | 1.68     | 1.43                     | 0.90-2.26               | 0.000                                                     |
|                             | Yes | 172/219          |          |                          |                         |                                                           |
| Convulsions                 | No  | 3033/3547        | 0.92     | 0.77                     | 0.40-1.49               | 0.084                                                     |
|                             | Yes | 90/104           |          |                          |                         |                                                           |

1 Adjusted OR after stratification by intervention status

2 Tests significance of difference in OR for association with ANC attendance between intervention and control wards

OR=Mantel Haenszel odds ratio; 95% CIca = cluster-adjusted 95% confidence interval

**Bold** font indicates an association significant at the 5% level

Table S3. Associations between reported pregnancy complications and delivery in a health facility

| Variable                         |     | Delivery in health facility | Crude OR | Adjusted OR <sup>1</sup> | 95% CIca of adjusted OR | p-value from test of heterogeneity of strata <sup>2</sup> |
|----------------------------------|-----|-----------------------------|----------|--------------------------|-------------------------|-----------------------------------------------------------|
| Persistent headache              | No  | 619/2253                    | 1.33     | 1.03                     | 0.86-1.23               | 0.239                                                     |
|                                  | Yes | 247/1111                    |          |                          |                         |                                                           |
| Dizziness or blurred vision      | No  | 670/2552                    | 1.12     | 0.84                     | 0.70-1.01               | 0.773                                                     |
|                                  | Yes | 196/812                     |          |                          |                         |                                                           |
| Swelling of face or hands        | No  | 732/2816                    | 1.09     | 0.86                     | 0.72-1.03               | 0.723                                                     |
|                                  | Yes | 134/548                     |          |                          |                         |                                                           |
| Vaginal bleeding                 | No  | 801/3183                    | 0.60     | 0.50                     | 0.14-1.76               | 0.078                                                     |
|                                  | Yes | 65/181                      |          |                          |                         |                                                           |
| Convulsions                      | No  | 827/3271                    | 0.47     | 0.40                     | 0.08-1.88               | 0.003                                                     |
|                                  | Yes | 39/93                       |          |                          |                         |                                                           |
| High blood pressure <sup>3</sup> | No  | 631/2466                    | 0.87     | 0.76                     | 0.50-1.17               | 0.193                                                     |
|                                  | Yes | 73/258                      |          |                          |                         |                                                           |

1 Adjusted OR after stratification by intervention status

2 Tests significance of difference in OR for association with facility delivery between intervention and control wards

3 Among those who reported any measurement of blood pressure

OR=Mantel Haenszel odds ratio; 95% CIca = cluster-adjusted 95% confidence interval
